# Supplementary material for: Origin of the exceptional selectivity of NaA zeolite for the radioactive isotope 90Sr2+
Source: Royal Society of Chemistry journal article supplement (doi:10.1039/d2qi01958b), 2022-01-01
Supplement: d2qi01958b1.pdf [file d2qi01958b1.pdf]

Electronic Supplementary Material (ESI) for Chemical Science. This journal is © The Royal Society of Chemistry 2022

Electronic supporting information

## Origin of the exceptional selectivity of NaA zeolite for the radioactive isotope $^{90}\text{Sr}^{2+}$

Wenfeng Hao,<sup>[a]</sup> Nana Yan,<sup>[b]</sup> Miao Xie,<sup>[c]</sup> Xiaojun Yan,<sup>[d]</sup> Xiliang Guo,<sup>[d]</sup> Pu Bai,<sup>[e]</sup> Tao Cheng,<sup>\*[c]</sup> Peng Guo<sup>[b]</sup>, Wenfu Yan,<sup>\*[a]</sup>

---

<sup>a.</sup> State Key Laboratory of Inorganic Synthesis and Preparative Chemistry, College of Chemistry, Jilin University, Changchun 130012, China.

<sup>b.</sup> National Engineering Laboratory for Methanol to Olefins, Dalian National Laboratory for Clean Energy, Dalian Institute of Chemical Physics, Chinese Academy of Sciences, Dalian 116023, China.

<sup>c.</sup> Institute of Functional Nano & Soft Materials (FUNSOM) and Jiangsu Key Laboratory for Carbon-Based Functional Materials & Devices, Soochow University, Suzhou 215123, China.

<sup>d.</sup> Division of Waste Disposal Technology, Waste Management Department, China Institute for Radiation Protection, Taiyuan 030006, Shanxi, China

<sup>e.</sup> Luoyang Jalon Micro-Nano New Materials Co., Ltd, Luoyang 471900, China

\* Co-corresponding authors

Email: yanw@jlu.edu.cn, tcheng@suda.edu.cn

## Table of contents in Supporting Information:

|                                                                                                                                                                                                                          |   |
|--------------------------------------------------------------------------------------------------------------------------------------------------------------------------------------------------------------------------|---|
| Fig. S1. The structure of the simulation model with the formal formula of $[\text{Na}_{14}\text{Al}_{24}\text{Si}_{24}\text{O}_{72}(\text{OH})_{48}\cdot 20\text{H}_2\text{O}]^{10-}$ .                                  | 1 |
| Fig. S2. The crystallographic structure of NaA-Sr-2. All $\text{Na}^+$ , $\text{Sr}^{2+}$ , and $\text{Ca}^{2+}$ cations locate in the single 6-rings ( <i>s6r</i> ) of the <i>lta</i> cage (highlighted in red circle). | 1 |
| Table S1. Adsorption data of NaA toward $^{90}\text{Sr}^{2+}$ .                                                                                                                                                          | 2 |
| Table S2. Crystallographic details of Rietveld refinements.                                                                                                                                                              | 3 |
| Table S3 Hydrated ions form energy of $\text{Na}^+(\text{H}_2\text{O})_6$ and $\text{Sr}^{2+}(\text{H}_2\text{O})_6$ .                                                                                                   | 4 |
| Table S4 Adsorption data of NaA toward $\text{Sr}^{2+}$ at different time.                                                                                                                                               | 5 |
| Table S5 Adsorption data of NaA toward $\text{Sr}^{2+}$ at different initial concentration.                                                                                                                              | 6 |
| Table S6 Adsorption data of NaA toward $\text{Sr}^{2+}$ at different pH values.                                                                                                                                          | 7 |
| Table S7 Adsorption data of NaA toward $\text{Sr}^{2+}$ at different adsorbent dosages.                                                                                                                                  | 8 |

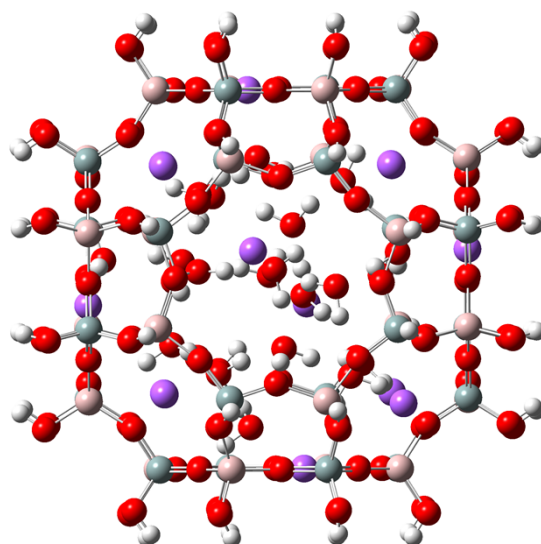

**Fig. S1.** The structure of the simulation model with the formal formula of  $[\text{Na}_{14}\text{Al}_{24}\text{Si}_{24}\text{O}_{72}(\text{OH})_{48}\cdot 20\text{H}_2\text{O}]^{10-}$ .

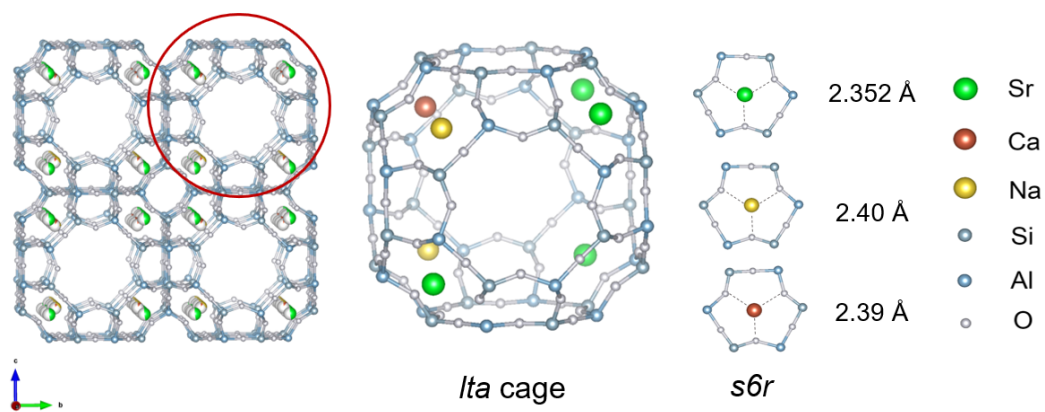

**Fig. S2.** The crystallographic structure of NaA-Sr-2. All  $\text{Na}^+$ ,  $\text{Sr}^{2+}$ , and  $\text{Ca}^{2+}$  cations locate in the single 6-rings (*s6r*) of the *lta* cage (highlighted in red circle).

**Table S1.** Adsorption data of NaA toward  $^{90}\text{Sr}^{2+}$

| Solid/Liquid Ratio (g/mL) | Initial activity concentration (Bq/L) | Equilibrium Activity concentration (Bq/L) | <sup>a</sup> Average (Bq/L) | <sup>b</sup> Standard Deviation | Removal Efficiency (%) | Average (%) | Standard Deviation | Distribution Coefficient (L/g) | Average (L/g) | Standard Deviation |
|---------------------------|---------------------------------------|-------------------------------------------|-----------------------------|---------------------------------|------------------------|-------------|--------------------|--------------------------------|---------------|--------------------|
| 1/20                      | 400                                   | 0.51                                      | 0.63                        | 0.12                            | 99.87                  | 99.84       | 0.0300             | 15.67                          | 13.07         | 2.51               |
|                           |                                       | 0.75                                      |                             |                                 | 99.81                  |             |                    | 10.65                          |               |                    |
|                           |                                       | 0.62                                      |                             |                                 | 99.85                  |             |                    | 12.88                          |               |                    |
| 1/100                     | 400                                   | 0.75                                      | 0.83                        | 0.08                            | 99.81                  | 99.79       | 0.0200             | 53.23                          | 48.20         | 4.73               |
|                           |                                       | 0.84                                      |                             |                                 | 99.79                  |             |                    | 47.52                          |               |                    |
|                           |                                       | 0.91                                      |                             |                                 | 99.77                  |             |                    | 43.86                          |               |                    |
| 1/500                     | 400                                   | 1.32                                      | 1.38                        | 0.06                            | 99.67                  | 99.65       | 0.0150             | 151.02                         | 144.26        | 6.36               |
|                           |                                       | 1.44                                      |                             |                                 | 99.64                  |             |                    | 138.39                         |               |                    |
|                           |                                       | 1.39                                      |                             |                                 | 99.65                  |             |                    | 143.38                         |               |                    |
| 1/1000                    | 400                                   | 1.43                                      | 1.56                        | 0.12                            | 99.64                  | 99.61       | 0.0303             | 278.72                         | 256.47        | 20.44              |
|                           |                                       | 1.58                                      |                             |                                 | 99.61                  |             |                    | 252.16                         |               |                    |
|                           |                                       | 1.67                                      |                             |                                 | 99.58                  |             |                    | 238.52                         |               |                    |
| 1/2000                    | 400                                   | 1.86                                      | 1.89                        | 0.06                            | 99.54                  | 99.53       | 0.0076             | 428.11                         | 421.57        | 13.39              |
|                           |                                       | 1.85                                      |                             |                                 | 99.54                  |             |                    | 430.43                         |               |                    |
|                           |                                       | 1.96                                      |                             |                                 | 99.51                  |             |                    | 406.16                         |               |                    |
| 1/5000                    | 400                                   | 40.35                                     | 41.52                       | 1.16                            | 89.91                  | 89.62       | 0.2889             | 44.57                          | 43.19         | 1.34               |
|                           |                                       | 42.66                                     |                             |                                 | 89.34                  |             |                    | 41.88                          |               |                    |
|                           |                                       | 41.55                                     |                             |                                 | 89.61                  |             |                    | 43.13                          |               |                    |

a: Average: 
$$\bar{x} = \frac{\sum_{i=1}^n x_i}{n}$$

*Standard Deviation:*  $S = \sqrt{\frac{\sum_{i=1}^n (x_i - \bar{x})^2}{n - 1}}$

b:

**Table S2.** Crystallographic details of Rietveld refinements.

| Sample             | NaA-Sr-1     | NaA-Sr-2     | NaA          |
|--------------------|--------------|--------------|--------------|
| Space group        | <i>Fm-3c</i> | <i>Fm-3c</i> | <i>Fm-3c</i> |
| a(Å)               | 24.6803(3)   | 24.6797(12)  | 24.5970(4)   |
| V(Å <sup>3</sup> ) | 15033.1(6)   | 15032(2)     | 14881.5(6)   |
| R <sub>p</sub>     | 0.03982      | 0.05238      | 0.02863      |
| R <sub>wp</sub>    | 0.05851      | 0.07557      | 0.04300      |
| R <sub>exp</sub>   | 0.01321      | 0.01311      | 0.01743      |
| R <sub>bragg</sub> | 0.03307      | 0.03754      | 0.03150      |
| GOF                | 4.43         | 5.76         | 2.47         |
| Reflections        | 516          | 516          | 512          |
| Parameters         | 52           | 52           | 49           |
| Restraints         | 6            | 6            | 6            |
| CCDC number        | 2163932      | 2163933      | 2163931      |

**Table S3** Hydrated ions form energy of  $\text{Na}^+(\text{H}_2\text{O})_6$  and  $\text{Sr}^{2+}(\text{H}_2\text{O})_6$

| Reaction                                                                                 | $\Delta E$ (eV) |
|------------------------------------------------------------------------------------------|-----------------|
| $\text{Na}^+ + 6 \text{H}_2\text{O} \rightarrow \text{Na}^+(\text{H}_2\text{O})_6$       | -7.31           |
| $\text{Sr}^{2+} + 6 \text{H}_2\text{O} \rightarrow \text{Sr}^{2+}(\text{H}_2\text{O})_6$ | -4.04           |

**Table S4** Adsorption data of NaA toward Sr<sup>2+</sup> at different time

| Contact Time (min) | Initial concentration (ppm) | Equilibrium concentration (ppm) | Average (ppm) | Standard Deviation | Removal Efficiency (%) | Average (%) | Standard Deviation |
|--------------------|-----------------------------|---------------------------------|---------------|--------------------|------------------------|-------------|--------------------|
| 0.25               | 100                         | 12.384                          | 12.133        | 3.734              | 87.616                 | 87.867      | 0.190              |
|                    |                             | 12.089                          |               |                    | 87.911                 |             |                    |
|                    |                             | 11.926                          |               |                    | 88.074                 |             |                    |
| 0.5                | 100                         | 10.756                          | 10.774        | 0.026              | 89.244                 | 89.226      | 0.022              |
|                    |                             | 10.804                          |               |                    | 89.196                 |             |                    |
|                    |                             | 10.762                          |               |                    | 89.239                 |             |                    |
| 1                  | 100                         | 4.894                           | 4.888         | 0.005              | 95.106                 | 95.112      | 0.004              |
|                    |                             | 4.885                           |               |                    | 95.115                 |             |                    |
|                    |                             | 4.885                           |               |                    | 95.115                 |             |                    |
| 2                  | 100                         | 0.089                           | 0.091         | 0.002              | 99.911                 | 99.909      | 0.002              |
|                    |                             | 0.093                           |               |                    | 99.907                 |             |                    |
|                    |                             | 0.090                           |               |                    | 99.910                 |             |                    |
| 3                  | 100                         | 0.068                           | 0.062         | 0.011              | 99.932                 | 99.938      | 0.009              |
|                    |                             | 0.069                           |               |                    | 99.931                 |             |                    |
|                    |                             | 0.049                           |               |                    | 99.951                 |             |                    |
| 4                  | 100                         | 0.058                           | 0.057         | 0.001              | 99.943                 | 99.943      | 0.000              |
|                    |                             | 0.057                           |               |                    | 99.944                 |             |                    |
|                    |                             | 0.057                           |               |                    | 99.944                 |             |                    |
| 5                  | 100                         | 0.044                           | 0.047         | 0.012              | 99.957                 | 99.953      | 0.010              |
|                    |                             | 0.037                           |               |                    | 99.963                 |             |                    |
|                    |                             | 0.061                           |               |                    | 99.939                 |             |                    |
| 6                  | 100                         | 0.035                           | 0.035         | 0.001              | 99.965                 | 99.965      | 0.001              |
|                    |                             | 0.037                           |               |                    | 99.963                 |             |                    |
|                    |                             | 0.035                           |               |                    | 99.965                 |             |                    |
| 7                  | 100                         | 0.041                           | 0.042         | 0.010              | 99.960                 | 99.958      | 0.008              |
|                    |                             | 0.052                           |               |                    | 99.948                 |             |                    |
|                    |                             | 0.033                           |               |                    | 99.967                 |             |                    |
| 8                  | 100                         | 0.028                           | 0.038         | 0.014              | 99.973                 | 99.962      | 0.012              |
|                    |                             | 0.054                           |               |                    | 99.946                 |             |                    |
|                    |                             | 0.032                           |               |                    | 99.968                 |             |                    |
| 9                  | 100                         | 0.030                           | 0.046         | 0.014              | 99.970                 | 99.954      | 0.012              |
|                    |                             | 0.049                           |               |                    | 99.952                 |             |                    |
|                    |                             | 0.059                           |               |                    | 99.941                 |             |                    |
| 10                 | 100                         | 0.040                           | 0.038         | 0.009              | 99.960                 | 99.962      | 0.008              |
|                    |                             | 0.046                           |               |                    | 99.954                 |             |                    |
|                    |                             | 0.028                           |               |                    | 99.972                 |             |                    |



**Table S5** Adsorption data of NaA toward Sr<sup>2+</sup> at different initial concentration

| Initial concentration (ppm) | Equilibrium concentration (ppm) | Average (ppm) | Standard Deviation | Adsorption capacity (mg/g) | Average (mg/g) | Standard Deviation |
|-----------------------------|---------------------------------|---------------|--------------------|----------------------------|----------------|--------------------|
| 50                          | 0.0376                          | 0.0241        | 0.0135             | 61.153                     | 61.170         | 0.017              |
|                             | 0.0241                          |               |                    |                            |                |                    |
|                             | 0.0106                          |               |                    |                            |                |                    |
| 100                         | 0.0303                          | 0.0379        | 0.0123             | 122.362                    | 122.353        | 0.015              |
|                             | 0.0314                          |               |                    |                            |                |                    |
|                             | 0.0521                          |               |                    |                            |                |                    |
| 150                         | 0.0893                          | 0.0796        | 0.0085             | 183.489                    | 183.501        | 0.010              |
|                             | 0.0732                          |               |                    |                            |                |                    |
|                             | 0.0764                          |               |                    |                            |                |                    |
| 200                         | 3.5094                          | 3.4933        | 0.0155             | 240.503                    | 240.522        | 0.019              |
|                             | 3.4920                          |               |                    |                            |                |                    |
|                             | 3.4785                          |               |                    |                            |                |                    |
| 250                         | 40.237                          | 41.9388       | 1.4901             | 256.747                    | 254.665        | 1.824              |
|                             | 42.567                          |               |                    |                            |                |                    |
|                             | 43.012                          |               |                    |                            |                |                    |
| 300                         | 76.053                          | 76.3467       | 0.5086             | 274.109                    | 273.749        | 0.623              |
|                             | 76.934                          |               |                    |                            |                |                    |
|                             | 76.053                          |               |                    |                            |                |                    |
| 350                         | 115.817                         | 116.8080      | 0.9548             | 286.638                    | 285.425        | 1.169              |
|                             | 116.885                         |               |                    |                            |                |                    |
|                             | 117.722                         |               |                    |                            |                |                    |
| 400                         | 164.152                         | 163.5083      | 1.1149             | 288.676                    | 289.463        | 1.365              |
|                             | 164.152                         |               |                    |                            |                |                    |
|                             | 162.221                         |               |                    |                            |                |                    |

**Table S6** Adsorption data of NaA toward Sr<sup>2+</sup> at different pH values

| Initial pH | Initial concentration (ppm) | Equilibrium concentration (ppm) | Average (ppm) | Standard Deviation | Removal Efficiency (%) | Average (%) | Standard Deviation |
|------------|-----------------------------|---------------------------------|---------------|--------------------|------------------------|-------------|--------------------|
| 3          | 100                         | 43.01                           | 43.240        | 0.7038             | 57.32                  | 56.683      | 0.678              |
|            |                             | 42.68                           |               |                    | 55.97                  |             |                    |
|            |                             | 44.03                           |               |                    | 56.76                  |             |                    |
| 4          | 100                         | 0.037                           | 0.036         | 0.0010             | 99.965                 | 99.964      | 0.095              |
|            |                             | 0.035                           |               |                    | 99.964                 |             |                    |
|            |                             | 0.036                           |               |                    | 99.964                 |             |                    |
| 5          | 100                         | 0.027                           | 0.035         | 0.0072             | 99.959                 | 99.962      | 0.716              |
|            |                             | 0.041                           |               |                    | 99.963                 |             |                    |
|            |                             | 0.038                           |               |                    | 99.965                 |             |                    |
| 6          | 100                         | 0.031                           | 0.040         | 0.0077             | 99.954                 | 99.957      | 0.770              |
|            |                             | 0.046                           |               |                    | 99.958                 |             |                    |
|            |                             | 0.043                           |               |                    | 99.960                 |             |                    |
| 7          | 100                         | 0.073                           | 0.049         | 0.0255             | 99.978                 | 99.959      | 0.255              |
|            |                             | 0.022                           |               |                    | 99.949                 |             |                    |
|            |                             | 0.051                           |               |                    | 99.951                 |             |                    |
| 8          | 100                         | 0.021                           | 0.035         | 0.0118             | 99.961                 | 99.961      | 1.178              |
|            |                             | 0.039                           |               |                    | 99.957                 |             |                    |
|            |                             | 0.043                           |               |                    | 99.965                 |             |                    |
| 9          | 100                         | 0.069                           | 0.045         | 0.0201             | 99.964                 | 99.962      | 0.201              |
|            |                             | 0.036                           |               |                    | 99.969                 |             |                    |
|            |                             | 0.032                           |               |                    | 99.955                 |             |                    |
| 10         | 100                         | 0.044                           | 0.041         | 0.0056             | 99.956                 | 99.960      | 0.561              |
|            |                             | 0.044                           |               |                    | 99.966                 |             |                    |
|            |                             | 0.034                           |               |                    | 99.959                 |             |                    |
| 11         | 100                         | 0.031                           | 0.035         | 0.0111             | 99.974                 | 99.964      | 1.112              |
|            |                             | 0.026                           |               |                    | 99.953                 |             |                    |
|            |                             | 0.047                           |               |                    | 99.965                 |             |                    |
| 12         | 100                         | 0.030                           | 0.046         | 0.0144             | 99.952                 | 99.949      | 0.014              |
|            |                             | 0.048                           |               |                    | 99.941                 |             |                    |
|            |                             | 0.059                           |               |                    | 99.954                 |             |                    |

**Table S7** Adsorption data of NaA toward Sr<sup>2+</sup> at different adsorbent dosages

| Solid/Liquid Ratio (g/mL) | Initial concentration (ppm) | Equilibrium concentration (ppm) | Average (ppm) | Standard Deviation | Removal Efficiency (%) | Average (%) | Standard Deviation | Adsorption capacity (mg/g) | Average (mg/g) | Standard Deviation |
|---------------------------|-----------------------------|---------------------------------|---------------|--------------------|------------------------|-------------|--------------------|----------------------------|----------------|--------------------|
| 1/100                     | 100                         | 0.043                           | 0.038         | 0.009              | 99.9566                | 99.962      | 0.009              | 12.235                     | 12.235         | 0.001              |
|                           |                             | 0.044                           |               |                    | 99.9562                |             |                    | 12.235                     |                |                    |
|                           |                             | 0.028                           |               |                    | 99.9719                |             |                    | 12.236                     |                |                    |
| 1/200                     | 100                         | 0.042                           | 0.035         | 0.006              | 99.9581                | 99.965      | 0.006              | 24.470                     | 24.471         | 0.001              |
|                           |                             | 0.030                           |               |                    | 99.9696                |             |                    | 24.472                     |                |                    |
|                           |                             | 0.034                           |               |                    | 99.9665                |             |                    | 24.472                     |                |                    |
| 1/500                     | 100                         | 0.028                           | 0.036         | 0.008              | 99.9722                | 99.964      | 0.008              | 61.182                     | 61.177         | 0.005              |
|                           |                             | 0.038                           |               |                    | 99.9621                |             |                    | 61.176                     |                |                    |
|                           |                             | 0.044                           |               |                    | 99.9563                |             |                    | 61.173                     |                |                    |
| 1/1000                    | 100                         | 0.040                           | 0.038         | 0.009              | 99.9599                | 99.962      | 0.009              | 122.350                    | 122.352        | 0.011              |
|                           |                             | 0.046                           |               |                    | 99.9538                |             |                    | 122.342                    |                |                    |
|                           |                             | 0.028                           |               |                    | 99.9722                |             |                    | 122.365                    |                |                    |
| 1/2000                    | 100                         | 1.342                           | 1.337         | 0.004              | 98.6581                | 98.663      | 0.004              | 241.513                    | 241.526        | 0.011              |
|                           |                             | 1.335                           |               |                    | 98.6651                |             |                    | 241.530                    |                |                    |
|                           |                             | 1.334                           |               |                    | 98.6664                |             |                    | 241.533                    |                |                    |
